# Supplementary material for: Development of double strand RNA mPEI nanoparticles and application in treating invasive breast cancer
Source: Royal Society of Chemistry journal article supplement (doi:10.1039/c9ra01889a), 2019-01-01
Supplement: c9ra01889a1.pdf [file c9ra01889a1.pdf]

## Supplementary information

### **Development of double strand RNA mPEI nanoparticles and the application in treating invasive breast cancer**

Rui Liu, Li-Min Mu, Jing Bai, Ya-Fei Du, Ying Xie, Wan-Liang Lu\*

State Key Laboratory of Natural and Biomimetic Drugs, Beijing key Laboratory of Molecular Pharmaceutics and New Drug System, and School of Pharmaceutical Sciences, Peking University, Beijing, China

**\* Corresponding author:**

Wan-Liang Lu, PhD

Professor and Vice Dean

School of Pharmaceutical Sciences

Peking University

Beijing 100191, China

E-mail: luwl@bjmu.edu.cn

Tel.: +8610 82802683

Fax: +8610 82802683

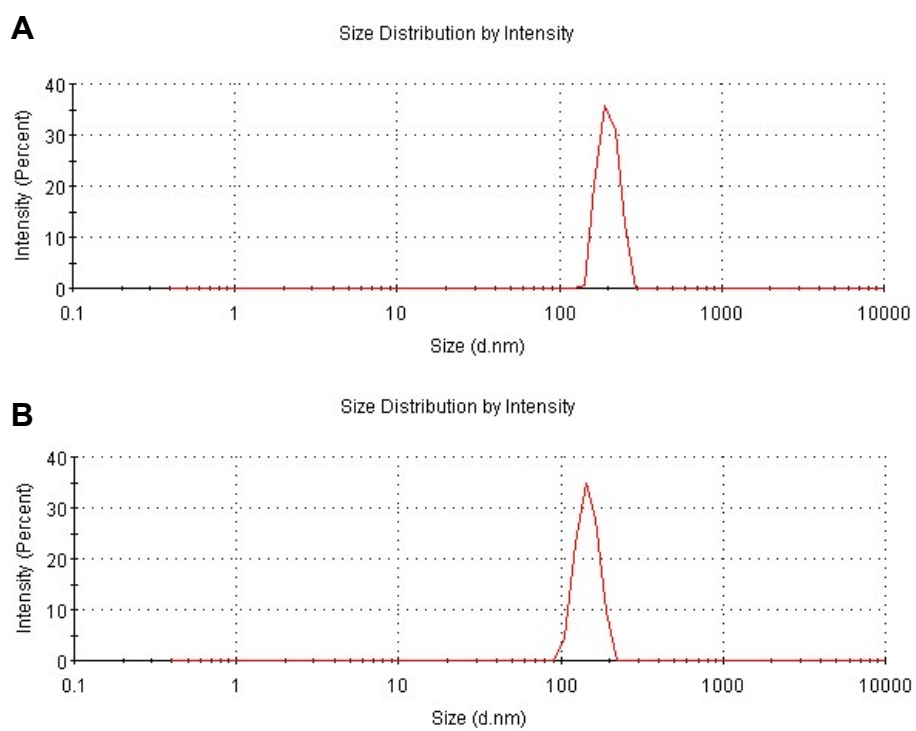

**Figure S1. Size distributions of mPEI and dsRNA mPEI nanoparticles.**

**Notes:**

**A.** Size distribution of mPEI;

**B.** Size distribution of dsRNA mPEI nanoparticles.

**Abbreviations:** mPEI, conjugate of MASA with PEI; dsRNA, double strand microRNA.
